# Supplementary material
Source: PubMed Central journal article supplement (PMC4266736)
Supplement: ejhg201450x1.pdf [file ejhg201450x1.pdf]

- Geography
- Caucasus
  - East Europe
  - South Europe
  - South Siberia
  - West Europe
  - Middle East
  - Central Asia
  - Roma

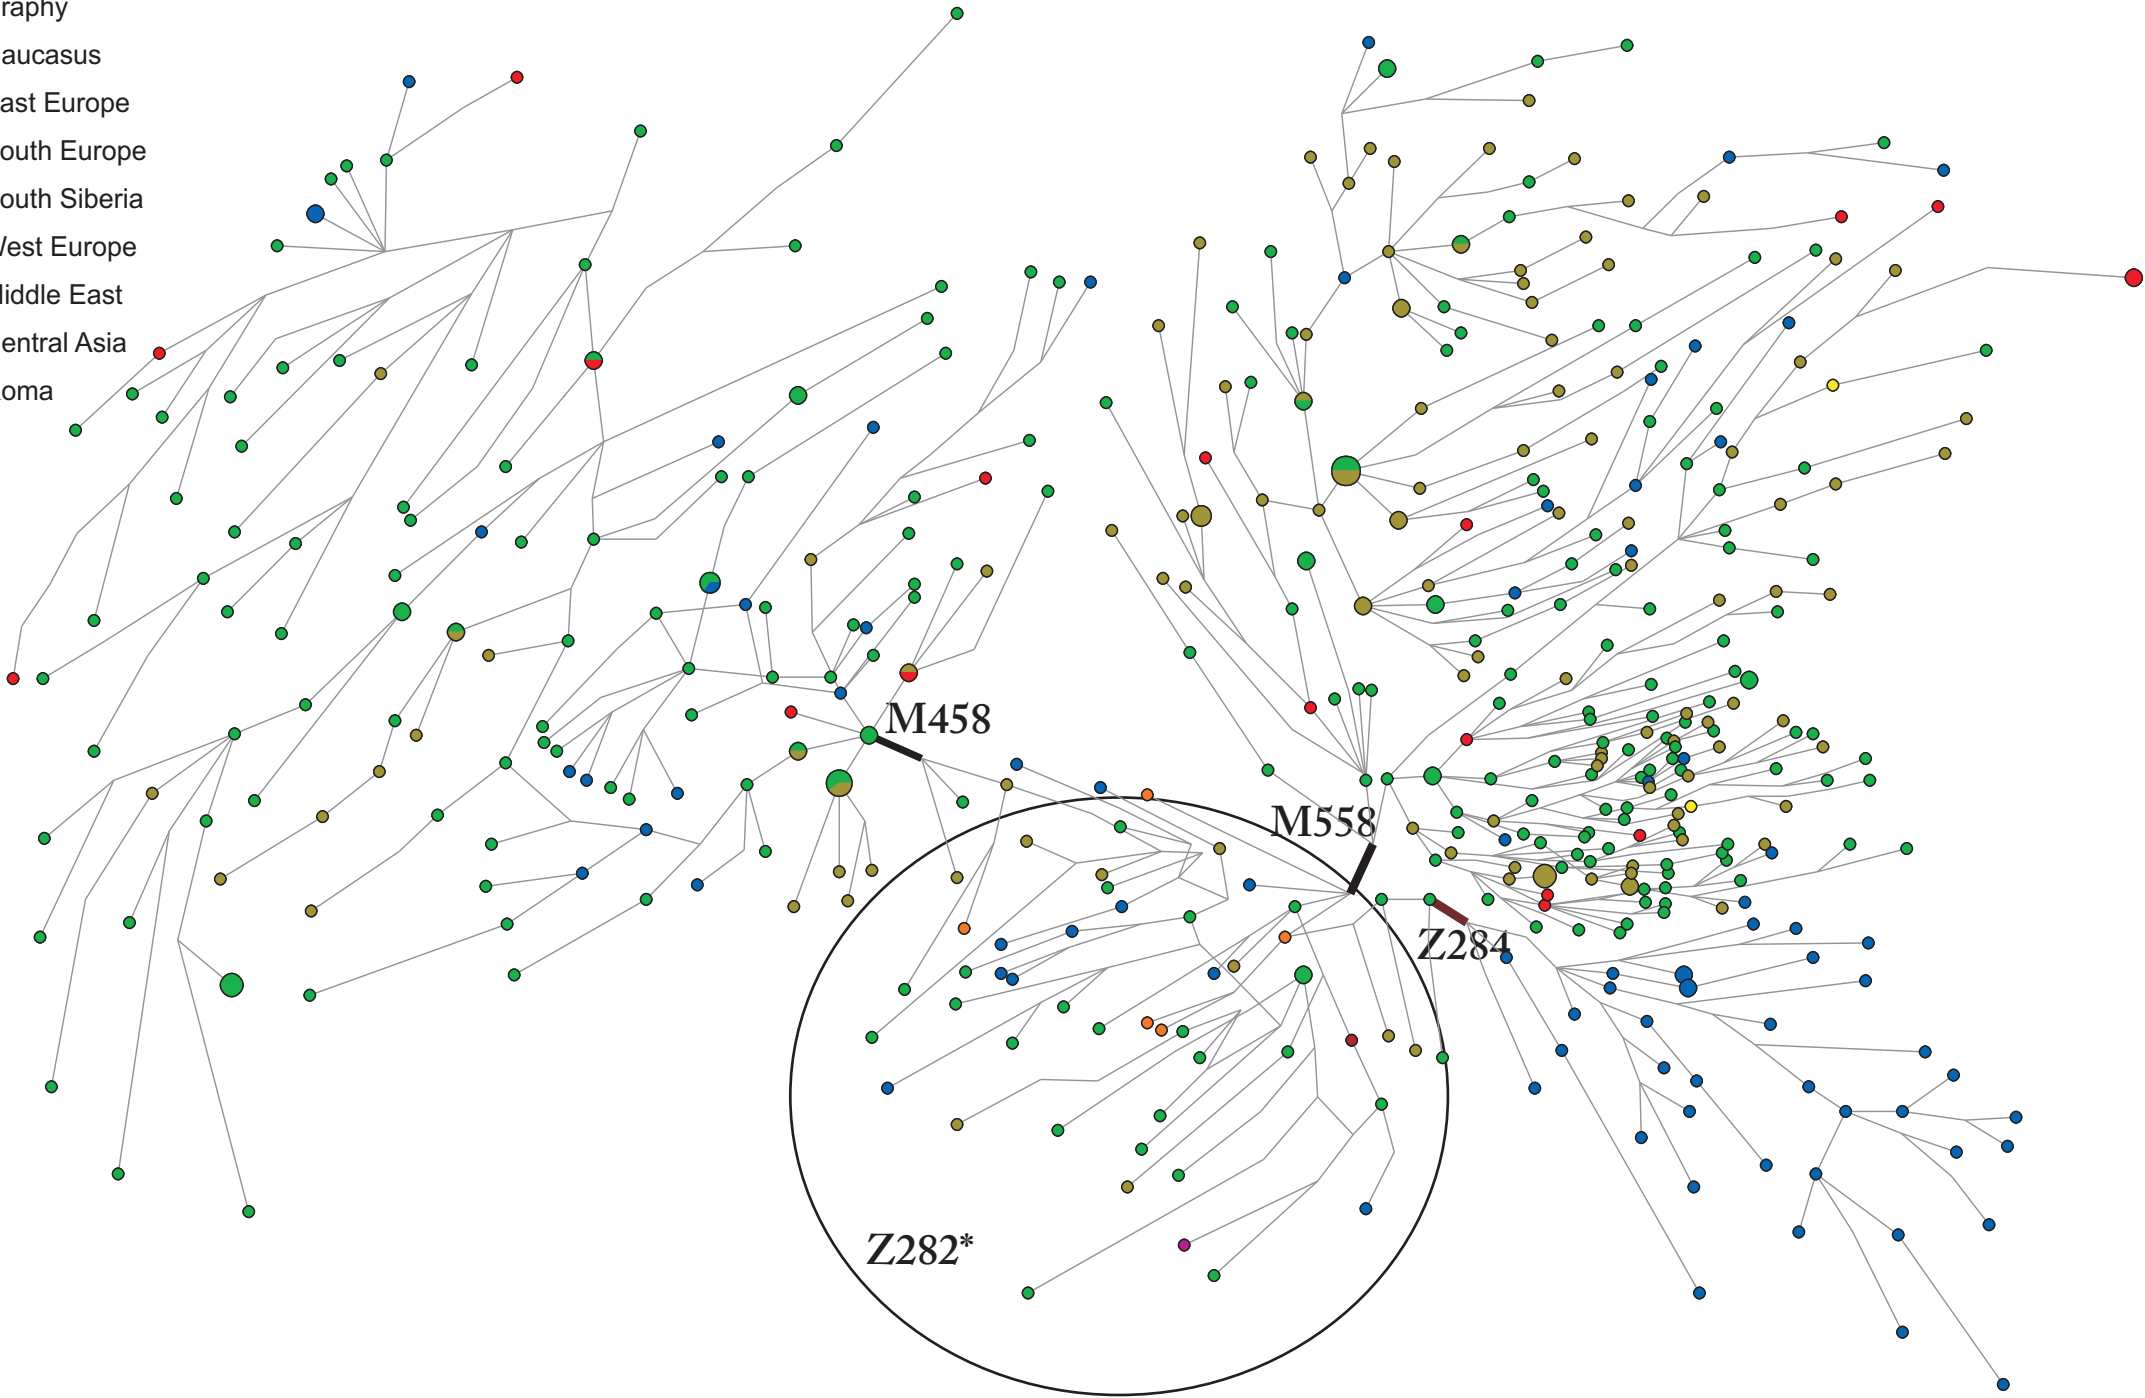

M458

M558

Z284

Z282\*
