# Supplementary material
Source: PubMed Central journal article supplement (PMC4266736)

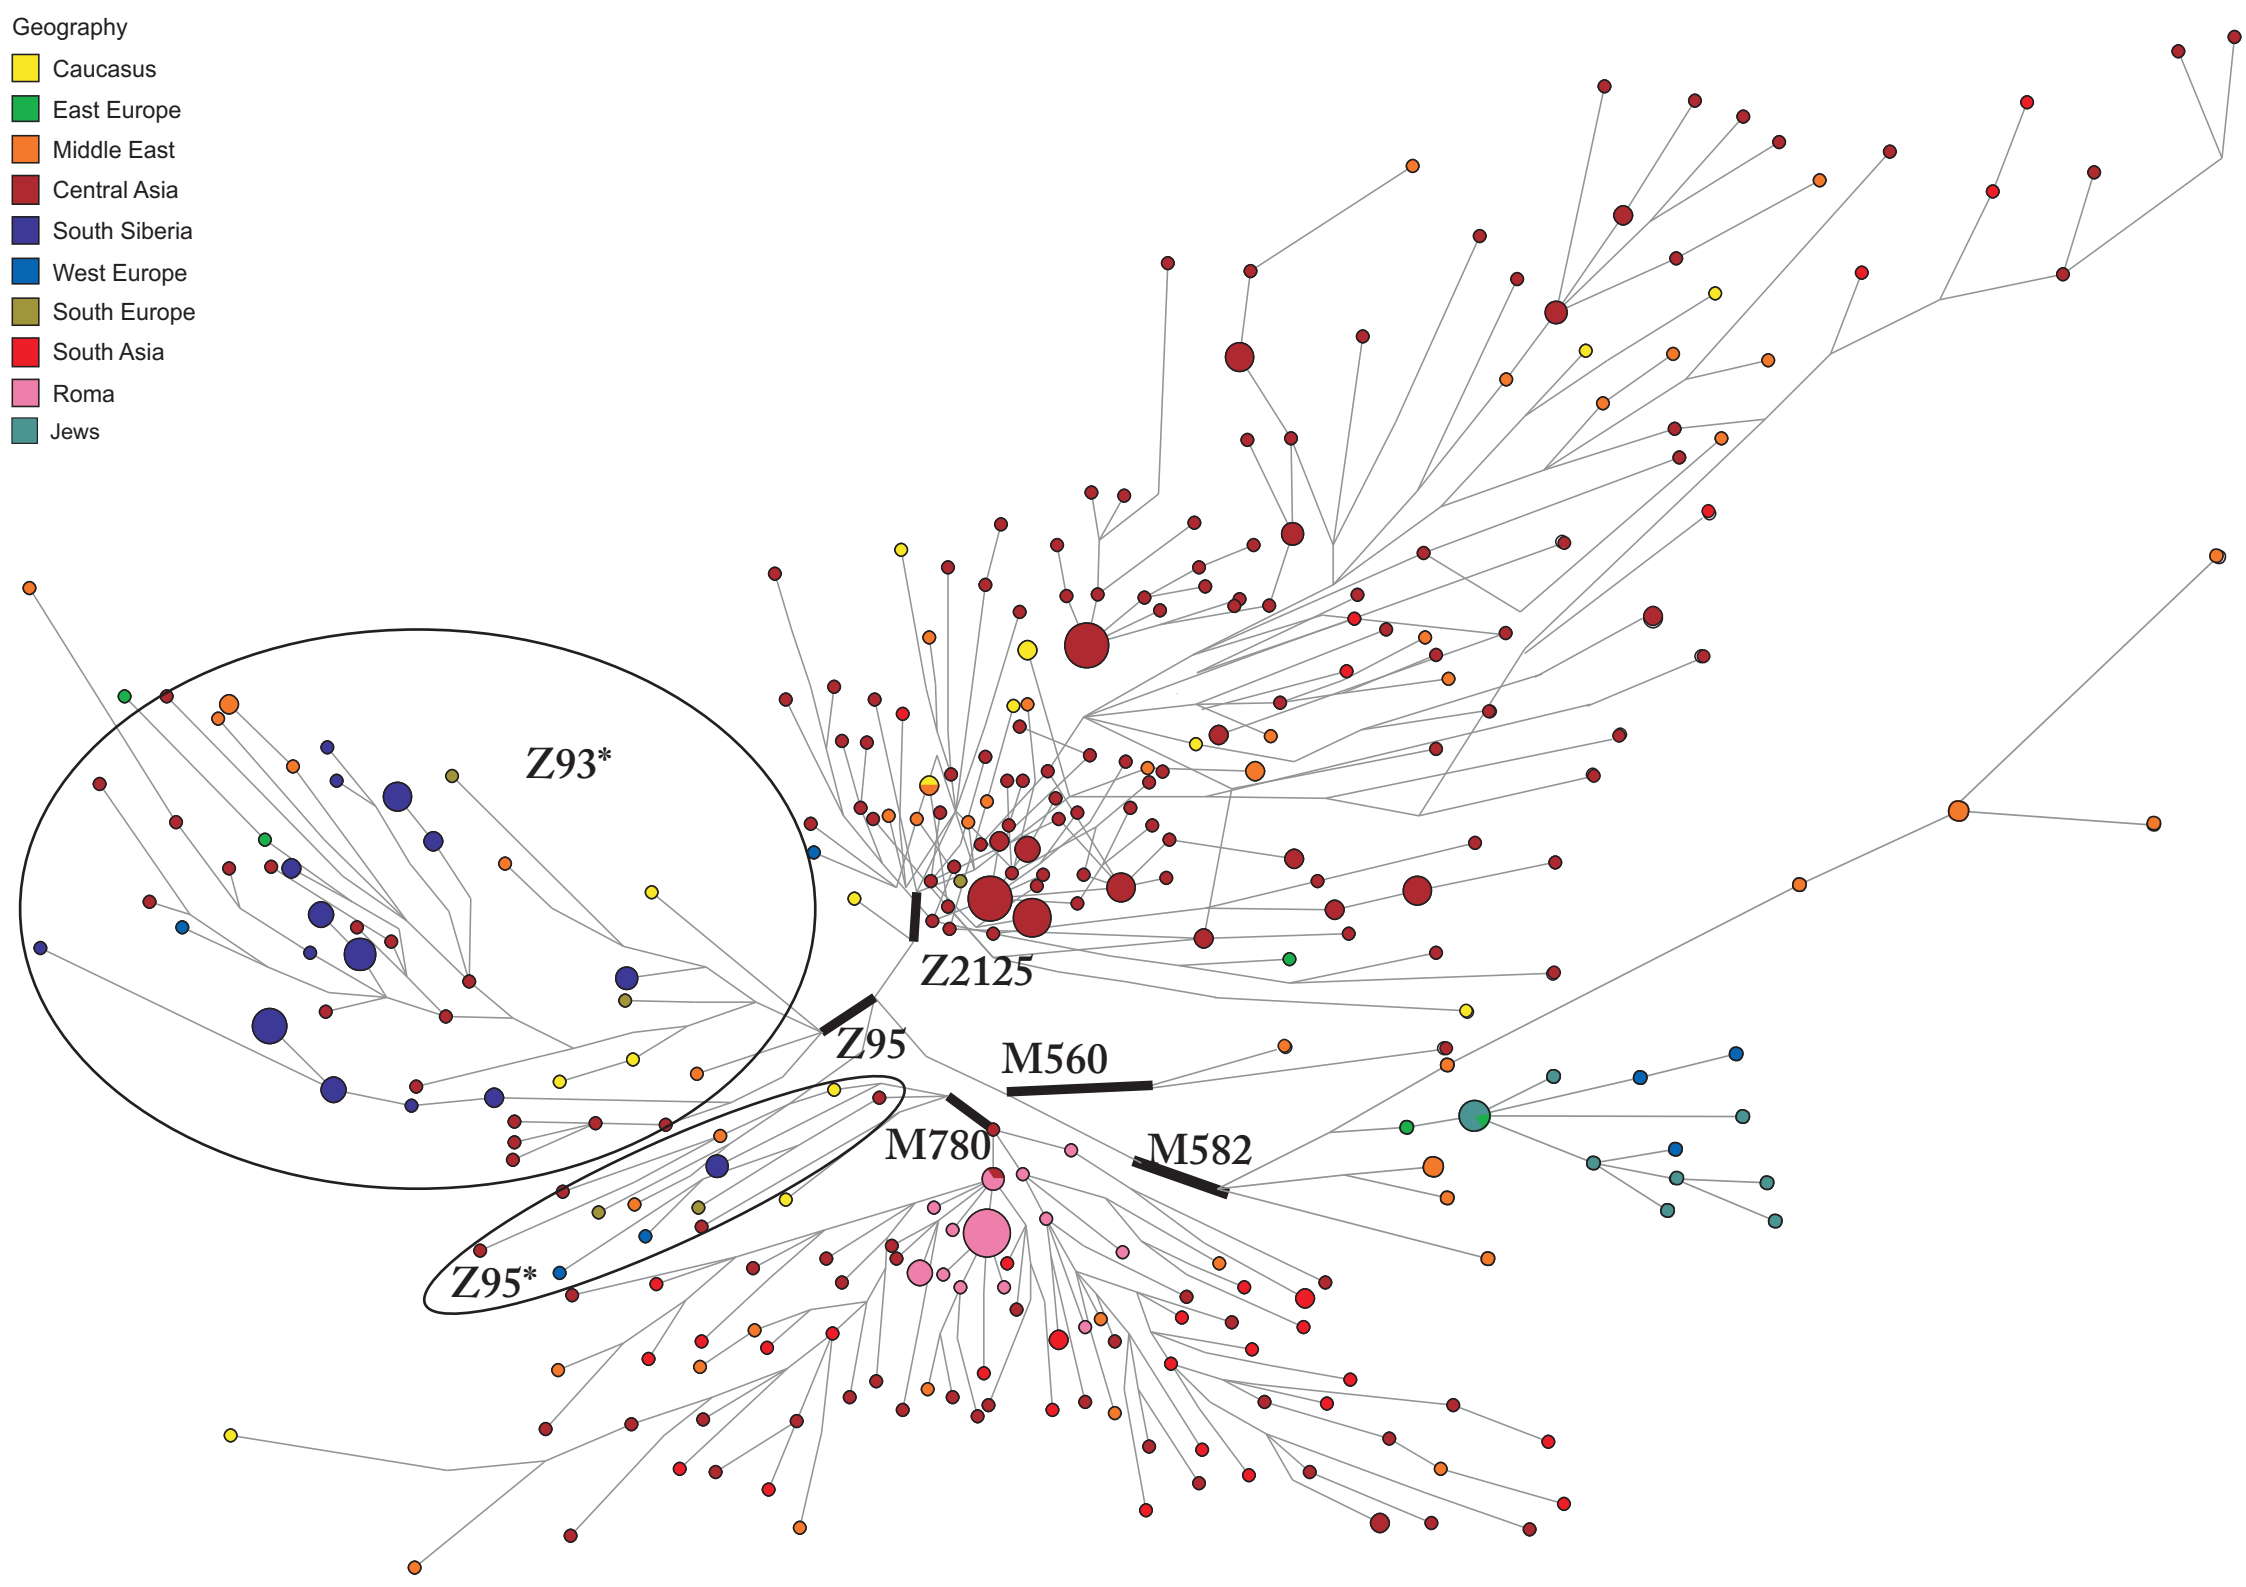

Supplement: ejhg201450x2.pdf [file ejhg201450x2.pdf]

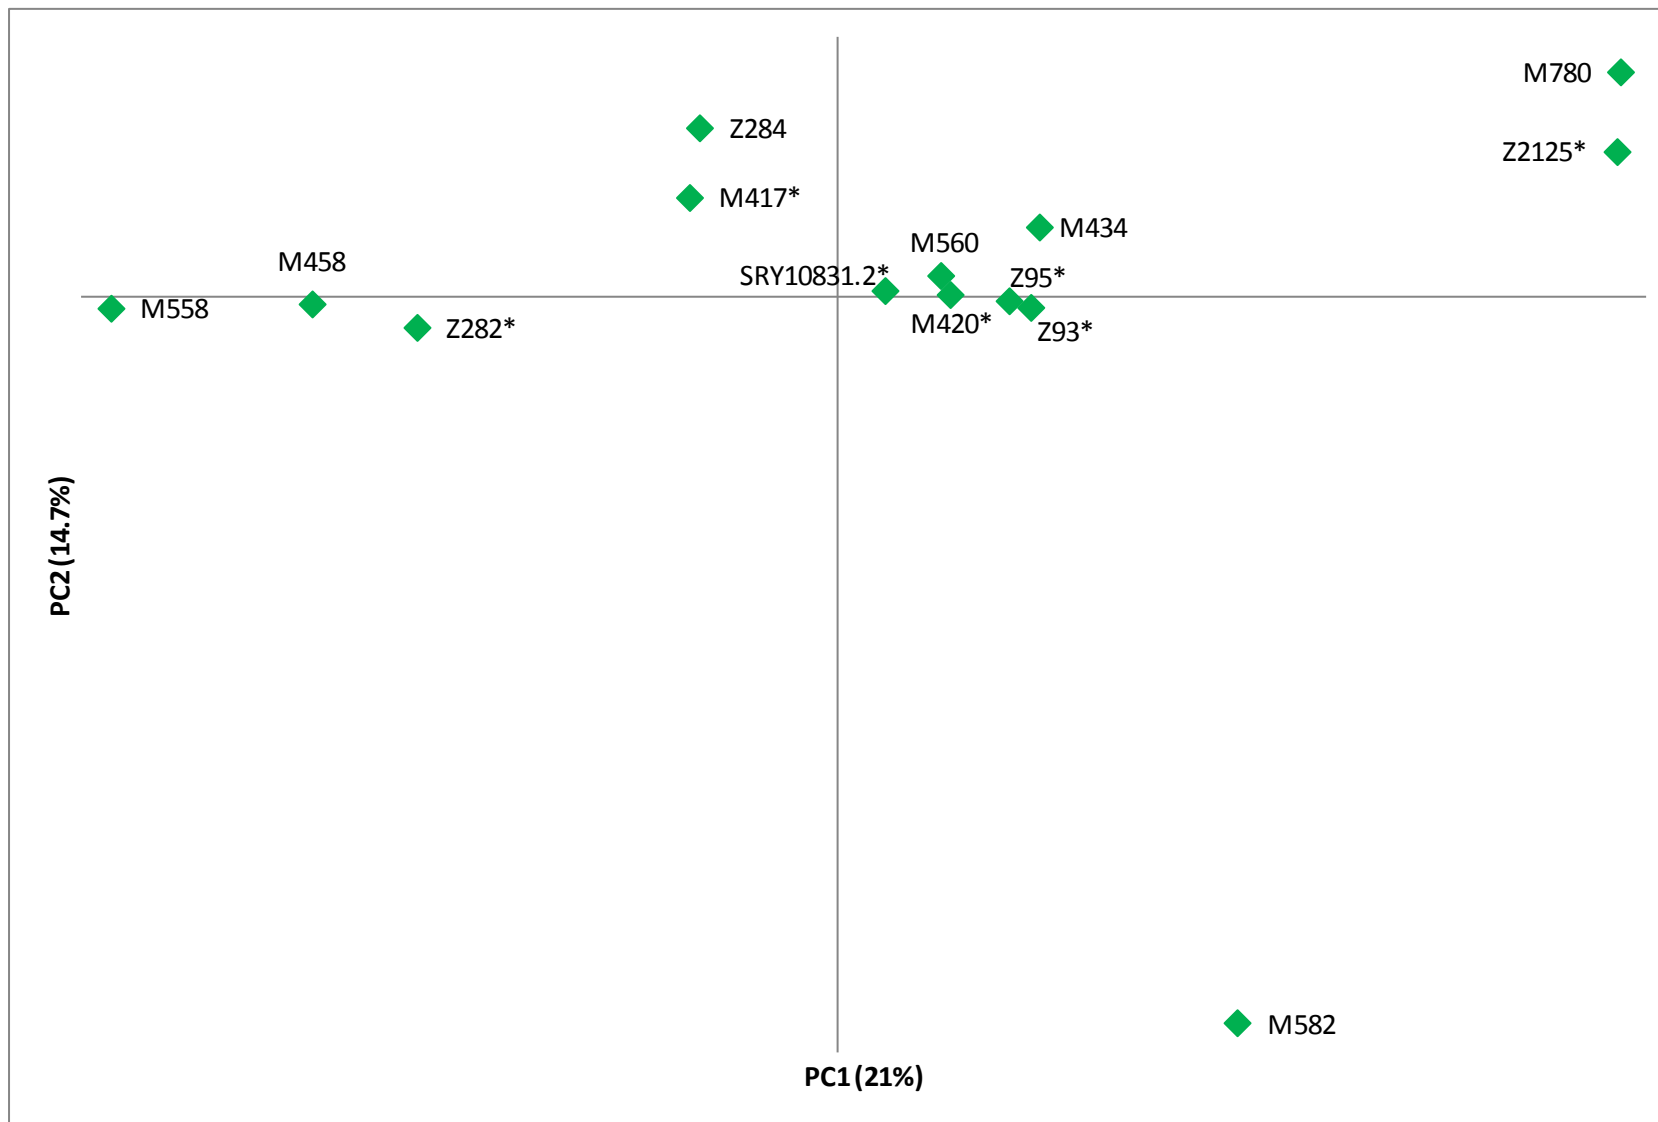

Supplement: ejhg201450x4.pdf [file ejhg201450x4.pdf]
